# Supplementary material for: Chirality of and gear motion in isopropyl methyl sulfide: A Fourier transform microwave study
Source: Royal Society of Chemistry journal article supplement (doi:10.1039/c002314k), 2010-01-01
Supplement: c002314k.pdf [file c002314k.pdf]

**Table S-1** All the observed lines of the *gauche* form of isopropyl methyl sulfide.

| J                         | K- | K+ | --- | J | K- | K+ | Sym | obs/MHz                 | diff/MHz |
|---------------------------|----|----|-----|---|----|----|-----|-------------------------|----------|
| <i>a</i> -type transition |    |    |     |   |    |    |     |                         |          |
| 1                         | 0  | 1  | --- | 0 | 0  | 0  | A   | 4905.6714               | 0.0027   |
| 1                         | 0  | 1  | --- | 0 | 0  | 0  | E   | 4905.6583               | -0.0004  |
| 2                         | 0  | 2  | --- | 1 | 0  | 1  | A   | 9723.6956               | -0.0035  |
| 2                         | 0  | 2  | --- | 1 | 0  | 1  | E   | 9723.6808               | 0.0011   |
| 2                         | 1  | 2  | --- | 1 | 1  | 1  | A   | 9162.0255               | 0.0045   |
| 2                         | 1  | 2  | --- | 1 | 1  | 1  | E   | 9162.0073               | -0.0023  |
| 2                         | 1  | 1  | --- | 1 | 1  | 0  | A   | 10460.6065              | -0.0027  |
| 2                         | 1  | 1  | --- | 1 | 1  | 0  | E   | 10460.5833              | 0.0020   |
| 3                         | 0  | 3  | --- | 2 | 0  | 2  | A   | 14376.5514              | -0.0013  |
| 3                         | 0  | 3  | --- | 2 | 0  | 2  | E   | 14376.5256              | 0.0009   |
| 3                         | 1  | 3  | --- | 2 | 1  | 2  | A   | 13691.5016              | 0.0018   |
| 3                         | 1  | 3  | --- | 2 | 1  | 2  | E   | 13691.4793              | -0.0017  |
| 3                         | 1  | 2  | --- | 2 | 1  | 1  | A   | 15631.8828              | -0.0014  |
| 3                         | 1  | 2  | --- | 2 | 1  | 1  | E   | 15631.8463              | 0.0019   |
| 3                         | 2  | 2  | --- | 2 | 2  | 1  | A   | 14716.9098              | 0.0024   |
| 3                         | 2  | 2  | --- | 2 | 2  | 1  | E   | 14716.9285              | -0.0039  |
| 3                         | 2  | 1  | --- | 2 | 2  | 0  | A   | 15057.2941              | 0.0029   |
| 3                         | 2  | 1  | --- | 2 | 2  | 0  | E   | 15057.2079              | 0.0021   |
| 4                         | 0  | 4  | --- | 3 | 0  | 3  | A   | 18828.0821              | -0.0002  |
| 4                         | 0  | 4  | --- | 3 | 0  | 3  | E   | 18828.0474              | 0.0003   |
| 4                         | 1  | 4  | --- | 3 | 1  | 3  | A   | 18168.9236              | -0.0021  |
| 4                         | 1  | 4  | --- | 3 | 1  | 3  | E   | 18168.9026              | 0.0017   |
| 4                         | 1  | 3  | --- | 3 | 1  | 2  | A   | 20721.7378              | 0.0017   |
| 4                         | 1  | 3  | --- | 3 | 1  | 2  | E   | 20721.6834              | -0.0004  |
| 4                         | 2  | 3  | --- | 3 | 2  | 2  | A   | 19554.0287              | 0.0004   |
| 4                         | 2  | 3  | --- | 3 | 2  | 2  | E   | 19553.9983              | -0.0001  |
| 4                         | 2  | 2  | --- | 3 | 2  | 1  | A   | 20347.9182              | -0.0012  |
| 4                         | 2  | 2  | --- | 3 | 2  | 1  | E   | 20347.8682              | 0.0013   |
| 4                         | 3  | 2  | --- | 3 | 3  | 1  | A   | 19777.4335 <sup>a</sup> | -0.0003  |
| 4                         | 3  | 2  | --- | 3 | 3  | 1  | E   | 19778.6311 <sup>a</sup> | -0.0001  |
| 4                         | 3  | 1  | --- | 3 | 3  | 0  | A   | 19821.7144              | 0.0004   |

|   |   |   |     |   |   |   |   |                         |         |
|---|---|---|-----|---|---|---|---|-------------------------|---------|
| 4 | 3 | 1 | --- | 3 | 3 | 0 | E | 19820.4397 <sup>a</sup> | 0.0025  |
| 4 | 2 | 3 | --- | 4 | 0 | 4 | A | 15500.1475              | -0.0007 |
| 4 | 2 | 3 | --- | 4 | 0 | 4 | E | 15499.9096              | 0.0006  |
| 5 | 0 | 5 | --- | 4 | 0 | 4 | A | 23114.5899              | -0.0003 |
| 5 | 0 | 5 | --- | 4 | 0 | 4 | E | 23114.5501              | 0.0004  |
| 5 | 1 | 5 | --- | 4 | 1 | 4 | A | 22591.1563              | -0.0014 |
| 5 | 1 | 5 | --- | 4 | 1 | 4 | E | 22591.1293              | 0.0015  |

*b*-type transition

|   |   |   |     |   |   |   |   |            |         |
|---|---|---|-----|---|---|---|---|------------|---------|
| 1 | 1 | 1 | --- | 0 | 0 | 0 | A | 8167.5829  | -0.0017 |
| 1 | 1 | 1 | --- | 0 | 0 | 0 | E | 8167.5173  | -0.0012 |
| 2 | 0 | 2 | --- | 1 | 1 | 1 | A | 6461.7789  | -0.0042 |
| 2 | 0 | 2 | --- | 1 | 1 | 1 | E | 6461.8242  | 0.0042  |
| 2 | 1 | 2 | --- | 1 | 0 | 1 | A | 12423.9340 | -0.0030 |
| 2 | 1 | 2 | --- | 1 | 0 | 1 | E | 12423.8678 | -0.0015 |
| 2 | 2 | 1 | --- | 1 | 1 | 0 | A | 20246.3311 | 0.0000  |
| 2 | 2 | 1 | --- | 1 | 1 | 0 | E | 20246.0715 | -0.0011 |
| 2 | 2 | 0 | --- | 1 | 1 | 1 | A | 20983.2511 | -0.0003 |
| 2 | 2 | 0 | --- | 1 | 1 | 1 | E | 20983.1254 | -0.0009 |
| 2 | 2 | 1 | --- | 2 | 1 | 2 | A | 11733.6090 | -0.0005 |
| 2 | 2 | 1 | --- | 2 | 1 | 2 | E | 11733.3593 | -0.0011 |
| 2 | 2 | 0 | --- | 2 | 1 | 1 | A | 9873.3405  | -0.0022 |
| 2 | 2 | 0 | --- | 2 | 1 | 1 | E | 9873.2470  | -0.0006 |
| 3 | 0 | 3 | --- | 2 | 1 | 2 | A | 11676.3129 | -0.0019 |
| 3 | 0 | 3 | --- | 2 | 1 | 2 | E | 11676.3349 | -0.0001 |
| 3 | 1 | 3 | --- | 2 | 0 | 2 | A | 16391.7305 | -0.0072 |
| 3 | 1 | 3 | --- | 2 | 0 | 2 | E | 16391.6759 | 0.0052  |
| 3 | 1 | 2 | --- | 2 | 2 | 1 | A | 5846.1667  | 0.0043  |
| 3 | 1 | 2 | --- | 2 | 2 | 1 | E | 5846.3556  | 0.0025  |
| 3 | 1 | 2 | --- | 3 | 0 | 3 | A | 5903.4593  | 0.0022  |
| 3 | 1 | 2 | --- | 3 | 0 | 3 | E | 5903.3770  | -0.0015 |
| 3 | 2 | 2 | --- | 3 | 1 | 3 | A | 12759.0147 | -0.0025 |
| 3 | 2 | 2 | --- | 3 | 1 | 3 | E | 12758.8112 | -0.0005 |
| 3 | 2 | 1 | --- | 3 | 1 | 2 | A | 9298.7471  | -0.0026 |
| 3 | 2 | 1 | --- | 3 | 1 | 2 | E | 9298.6089  | 0.0000  |

|   |   |   |     |   |   |   |   |                         |         |
|---|---|---|-----|---|---|---|---|-------------------------|---------|
| 3 | 3 | 1 | --- | 3 | 2 | 2 | A | 17984.1862 <sup>a</sup> | 0.0009  |
| 3 | 3 | 1 | --- | 3 | 2 | 2 | E | 17982.4242 <sup>a</sup> | 0.0029  |
| 3 | 3 | 0 | --- | 3 | 2 | 1 | A | 17563.6533 <sup>a</sup> | 0.0015  |
| 3 | 3 | 0 | --- | 3 | 2 | 1 | E | 17564.8488 <sup>a</sup> | 0.0032  |
| 4 | 0 | 4 | --- | 3 | 1 | 3 | A | 16812.8981              | 0.0008  |
| 4 | 0 | 4 | --- | 3 | 1 | 3 | E | 16812.8981              | -0.0030 |
| 4 | 1 | 4 | --- | 3 | 0 | 3 | A | 20184.1104              | -0.0003 |
| 4 | 1 | 4 | --- | 3 | 0 | 3 | E | 20184.0470              | 0.0001  |
| 4 | 1 | 3 | --- | 3 | 2 | 2 | A | 11850.9883              | -0.0028 |
| 4 | 1 | 3 | --- | 3 | 2 | 2 | E | 11851.1051              | 0.0005  |
| 4 | 1 | 3 | --- | 4 | 0 | 4 | A | 7797.1122               | 0.0012  |
| 4 | 1 | 3 | --- | 4 | 0 | 4 | E | 7797.0154               | 0.0002  |
| 4 | 2 | 3 | --- | 4 | 1 | 4 | A | 14144.1200              | 0.0002  |
| 4 | 2 | 3 | --- | 4 | 1 | 4 | E | 14143.9082              | -0.0010 |
| 4 | 2 | 2 | --- | 4 | 1 | 3 | A | 8924.9333               | 0.0003  |
| 4 | 2 | 2 | --- | 4 | 1 | 3 | E | 8924.7918               | -0.0002 |
| 4 | 3 | 2 | --- | 4 | 2 | 3 | A | 18207.5894              | -0.0014 |
| 4 | 3 | 2 | --- | 4 | 2 | 3 | E | 18207.0565              | 0.0024  |
| 4 | 3 | 1 | --- | 4 | 2 | 2 | A | 17037.4424              | -0.0040 |
| 4 | 3 | 1 | --- | 4 | 2 | 2 | E | 17037.4218              | 0.0059  |
| 5 | 0 | 5 | --- | 4 | 1 | 4 | A | 21758.5653              | 0.0035  |
| 5 | 0 | 5 | --- | 4 | 1 | 4 | E | 21758.5473              | -0.0026 |
| 5 | 1 | 5 | --- | 4 | 0 | 4 | A | 23947.1848              | -0.0013 |
| 5 | 1 | 5 | --- | 4 | 0 | 4 | E | 23947.1294              | 0.0019  |
| 5 | 1 | 5 | --- | 4 | 2 | 2 | A | 7225.1398               | -0.0023 |
| 5 | 1 | 5 | --- | 4 | 2 | 2 | E | 7225.3208               | 0.0005  |
| 5 | 1 | 4 | --- | 4 | 2 | 3 | A | 17983.4370              | -0.0024 |
| 5 | 1 | 4 | --- | 4 | 2 | 3 | E | 17983.5208              | 0.0025  |
| 5 | 2 | 4 | --- | 4 | 3 | 1 | A | 6074.2752               | 0.0044  |
| 5 | 2 | 4 | --- | 4 | 3 | 1 | E | 6074.2486               | -0.0048 |
| 5 | 2 | 3 | --- | 4 | 3 | 2 | A | 8757.1373               | 0.0001  |
| 5 | 2 | 3 | --- | 4 | 3 | 2 | E | 8757.6166               | 0.0004  |
| 5 | 1 | 4 | --- | 5 | 0 | 5 | A | 10368.9987              | 0.0013  |
| 5 | 1 | 4 | --- | 5 | 0 | 5 | E | 10368.8769              | -0.0007 |
| 5 | 2 | 4 | --- | 5 | 1 | 5 | A | 15886.5753              | 0.0003  |

|   |   |   |     |   |   |   |   |            |         |
|---|---|---|-----|---|---|---|---|------------|---------|
| 5 | 2 | 4 | --- | 5 | 1 | 5 | E | 15886.3491 | 0.0002  |
| 5 | 2 | 3 | --- | 5 | 1 | 4 | A | 8981.2894  | 0.0009  |
| 5 | 2 | 3 | --- | 5 | 1 | 4 | E | 8981.1519  | 0.0000  |
| 5 | 3 | 3 | --- | 5 | 2 | 4 | A | 18632.7939 | 0.0007  |
| 5 | 3 | 3 | --- | 5 | 2 | 4 | E | 18632.4424 | 0.0001  |
| 5 | 3 | 2 | --- | 5 | 2 | 3 | A | 16204.3611 | 0.0011  |
| 5 | 3 | 2 | --- | 5 | 2 | 3 | E | 16204.1489 | -0.0004 |
| 6 | 1 | 6 | --- | 5 | 2 | 3 | A | 8445.1422  | -0.0004 |
| 6 | 1 | 6 | --- | 5 | 2 | 3 | E | 8445.3465  | -0.0004 |
| 6 | 2 | 5 | --- | 5 | 3 | 2 | A | 10208.6916 | 0.0012  |
| 6 | 2 | 5 | --- | 5 | 3 | 2 | E | 10208.8582 | 0.0008  |
| 6 | 2 | 4 | --- | 5 | 3 | 3 | A | 15137.6909 | -0.0009 |
| 6 | 2 | 4 | --- | 5 | 3 | 3 | E | 15137.9560 | -0.0004 |
| 6 | 1 | 5 | --- | 6 | 0 | 6 | A | 13524.5770 | -0.0012 |
| 6 | 1 | 5 | --- | 6 | 0 | 6 | E | 13524.4279 | 0.0009  |
| 6 | 2 | 5 | --- | 6 | 1 | 6 | A | 17967.9086 | 0.0008  |
| 6 | 2 | 5 | --- | 6 | 1 | 6 | E | 17967.6600 | 0.0001  |
| 6 | 2 | 4 | --- | 6 | 1 | 5 | A | 9645.4519  | 0.0009  |
| 6 | 2 | 4 | --- | 6 | 1 | 5 | E | 9645.3165  | 0.0002  |
| 6 | 3 | 4 | --- | 6 | 2 | 5 | A | 19324.1170 | 0.0011  |
| 6 | 3 | 4 | --- | 6 | 2 | 5 | E | 19323.8028 | -0.0001 |
| 6 | 3 | 3 | --- | 6 | 2 | 4 | A | 15183.1913 | 0.0005  |
| 6 | 3 | 3 | --- | 6 | 2 | 4 | E | 15182.9512 | 0.0002  |
| 7 | 1 | 7 | --- | 6 | 2 | 4 | A | 8599.4056  | -0.0030 |
| 7 | 1 | 7 | --- | 6 | 2 | 4 | E | 8599.6531  | 0.0021  |
| 7 | 2 | 6 | --- | 6 | 3 | 3 | A | 13768.3845 | -0.0009 |
| 7 | 2 | 6 | --- | 6 | 3 | 3 | E | 13768.5921 | 0.0011  |
| 7 | 2 | 5 | --- | 6 | 3 | 4 | A | 21846.9524 | -0.0021 |
| 7 | 2 | 5 | --- | 6 | 3 | 4 | E | 21847.1489 | 0.0015  |
| 7 | 3 | 5 | --- | 6 | 4 | 2 | A | 9743.0544  | -0.0014 |
| 7 | 3 | 4 | --- | 6 | 4 | 3 | A | 11141.2160 | -0.0016 |
| 7 | 1 | 6 | --- | 7 | 0 | 7 | A | 17060.0071 | -0.0009 |
| 7 | 1 | 6 | --- | 7 | 0 | 7 | E | 17059.8210 | 0.0012  |
| 7 | 2 | 6 | --- | 7 | 1 | 7 | A | 20352.1684 | 0.0008  |
| 7 | 2 | 6 | --- | 7 | 1 | 7 | E | 20351.8915 | 0.0005  |

|   |   |   |     |   |   |   |   |            |         |
|---|---|---|-----|---|---|---|---|------------|---------|
| 7 | 2 | 5 | --- | 7 | 1 | 6 | A | 11043.3751 | 0.0011  |
| 7 | 2 | 5 | --- | 7 | 1 | 6 | E | 11043.2365 | 0.0007  |
| 7 | 3 | 5 | --- | 7 | 2 | 6 | A | 20333.1485 | 0.0009  |
| 7 | 3 | 5 | --- | 7 | 2 | 6 | E | 20332.8418 | 0.0010  |
| 7 | 3 | 4 | --- | 7 | 2 | 5 | A | 14214.8519 | 0.0004  |
| 7 | 3 | 4 | --- | 7 | 2 | 5 | E | 14214.6159 | -0.0005 |
| 7 | 4 | 3 | --- | 7 | 3 | 4 | A | 23694.5346 | -0.0009 |
| 7 | 4 | 3 | --- | 7 | 3 | 4 | E | 23694.4079 | 0.0024  |
| 8 | 2 | 7 | --- | 7 | 3 | 4 | A | 16524.2983 | -0.0002 |
| 8 | 2 | 7 | --- | 7 | 3 | 4 | E | 16524.5159 | -0.0008 |
| 8 | 3 | 6 | --- | 7 | 4 | 3 | A | 14522.1952 | 0.0018  |
| 8 | 3 | 6 | --- | 7 | 4 | 3 | E | 14522.2281 | -0.0017 |
| 8 | 3 | 5 | --- | 7 | 4 | 4 | A | 17360.1343 | -0.0006 |
| 8 | 3 | 5 | --- | 7 | 4 | 4 | E | 17360.7160 | -0.0006 |
| 8 | 4 | 5 | --- | 7 | 5 | 2 | A | 7867.9415  | -0.0003 |
| 8 | 4 | 4 | --- | 7 | 5 | 3 | A | 8113.7759  | 0.0030  |
| 8 | 1 | 7 | --- | 8 | 0 | 8 | A | 20743.7006 | -0.0015 |
| 8 | 1 | 7 | --- | 8 | 0 | 8 | E | 20743.4770 | -0.0002 |
| 8 | 2 | 7 | --- | 8 | 1 | 8 | A | 22989.6780 | -0.0006 |
| 8 | 2 | 7 | --- | 8 | 1 | 8 | E | 22989.3645 | 0.0008  |
| 8 | 2 | 6 | --- | 8 | 1 | 7 | A | 13239.6231 | -0.0001 |
| 8 | 2 | 6 | --- | 8 | 1 | 7 | E | 13239.4751 | 0.0012  |
| 8 | 3 | 6 | --- | 8 | 2 | 7 | A | 21692.4311 | 0.0007  |
| 8 | 3 | 6 | --- | 8 | 2 | 7 | E | 21692.1185 | -0.0001 |
| 8 | 3 | 5 | --- | 8 | 2 | 6 | A | 13587.7737 | 0.0003  |
| 8 | 3 | 5 | --- | 8 | 2 | 6 | E | 13587.5530 | -0.0002 |
| 8 | 4 | 4 | --- | 8 | 3 | 5 | A | 22679.4888 | 0.0005  |
| 8 | 4 | 4 | --- | 8 | 3 | 5 | E | 22679.1886 | -0.0011 |
| 9 | 2 | 8 | --- | 8 | 3 | 5 | A | 18264.4718 | -0.0012 |
| 9 | 2 | 8 | --- | 8 | 3 | 5 | E | 18264.7033 | 0.0007  |
| 9 | 3 | 7 | --- | 8 | 4 | 4 | A | 18996.7389 | -0.0002 |
| 9 | 3 | 7 | --- | 8 | 4 | 4 | E | 18996.9446 | 0.0007  |
| 9 | 2 | 7 | --- | 9 | 1 | 8 | A | 16194.2154 | -0.0005 |
| 9 | 2 | 7 | --- | 9 | 1 | 8 | E | 16194.0461 | 0.0004  |
| 9 | 3 | 7 | --- | 9 | 2 | 8 | A | 23411.7543 | -0.0001 |

|                           |   |   |     |    |   |   |   |            |         |
|---------------------------|---|---|-----|----|---|---|---|------------|---------|
| 9                         | 3 | 7 | --- | 9  | 2 | 8 | E | 23411.4313 | 0.0003  |
| 9                         | 3 | 6 | --- | 9  | 2 | 7 | A | 13559.1945 | 0.0004  |
| 9                         | 3 | 6 | --- | 9  | 2 | 7 | E | 13558.9904 | 0.0000  |
| 9                         | 4 | 5 | --- | 9  | 3 | 6 | A | 21359.4198 | 0.0000  |
| 9                         | 4 | 5 | --- | 9  | 3 | 6 | E | 21359.0779 | -0.0022 |
| 10                        | 3 | 8 | --- | 9  | 4 | 5 | A | 22979.7884 | -0.0007 |
| 10                        | 3 | 8 | --- | 9  | 4 | 5 | E | 22980.0383 | 0.0013  |
| 10                        | 4 | 7 | --- | 9  | 5 | 4 | A | 18166.6825 | -0.0002 |
| 10                        | 4 | 7 | --- | 9  | 5 | 4 | E | 18166.0178 | 0.0038  |
| 10                        | 2 | 8 | --- | 10 | 1 | 9 | A | 19739.5291 | -0.0018 |
| 10                        | 2 | 8 | --- | 10 | 1 | 9 | E | 19739.3281 | -0.0008 |
| 10                        | 3 | 7 | --- | 10 | 2 | 8 | A | 14314.4183 | 0.0005  |
| 10                        | 3 | 7 | --- | 10 | 2 | 8 | E | 14314.2278 | 0.0010  |
| 10                        | 4 | 6 | --- | 10 | 3 | 7 | A | 19922.7810 | -0.0005 |
| 10                        | 4 | 6 | --- | 10 | 3 | 7 | E | 19922.4409 | -0.0023 |
| 11                        | 3 | 8 | --- | 11 | 2 | 9 | A | 15961.6774 | -0.0001 |
| 11                        | 3 | 8 | --- | 11 | 2 | 9 | E | 15961.4926 | 0.0004  |
| <i>c</i> -type transition |   |   |     |    |   |   |   |            |         |
| 1                         | 1 | 0 | --- | 0  | 0 | 0 | A | 8816.8813  | -0.0028 |
| 1                         | 1 | 0 | --- | 0  | 0 | 0 | E | 8816.8163  | 0.0004  |
| 2                         | 0 | 2 | --- | 1  | 1 | 0 | A | 5812.4897  | 0.0060  |
| 2                         | 0 | 2 | --- | 1  | 1 | 0 | E | 5812.5206  | -0.0020 |
| 2                         | 1 | 1 | --- | 1  | 0 | 1 | A | 14371.8255 | 0.0008  |
| 2                         | 1 | 1 | --- | 1  | 0 | 1 | E | 14371.7393 | 0.0009  |
| 2                         | 2 | 1 | --- | 1  | 1 | 1 | A | 20895.6285 | -0.0021 |
| 2                         | 2 | 1 | --- | 1  | 1 | 1 | E | 20895.3698 | -0.0002 |
| 2                         | 2 | 0 | --- | 1  | 1 | 0 | A | 20333.9514 | -0.0006 |
| 2                         | 2 | 0 | --- | 1  | 1 | 0 | E | 20333.8294 | 0.0005  |
| 2                         | 2 | 1 | --- | 2  | 1 | 1 | A | 9785.7192  | -0.0026 |
| 2                         | 2 | 1 | --- | 2  | 1 | 1 | E | 9785.4909  | -0.0004 |
| 2                         | 2 | 0 | --- | 2  | 1 | 2 | A | 11821.2274 | -0.0030 |
| 2                         | 2 | 0 | --- | 2  | 1 | 2 | E | 11821.1170 | 0.0003  |
| 3                         | 0 | 3 | --- | 2  | 1 | 1 | A | 9728.4311  | 0.0040  |
| 3                         | 0 | 3 | --- | 2  | 1 | 1 | E | 9728.4655  | -0.0004 |
| 3                         | 1 | 2 | --- | 2  | 0 | 2 | A | 20280.0091 | -0.0007 |

|   |   |   |     |   |   |   |   |                         |         |
|---|---|---|-----|---|---|---|---|-------------------------|---------|
| 3 | 1 | 2 | --- | 2 | 0 | 2 | E | 20279.9041              | 0.0010  |
| 3 | 1 | 2 | --- | 2 | 2 | 0 | A | 5758.5511               | 0.0096  |
| 3 | 1 | 2 | --- | 2 | 2 | 0 | E | 5758.5973               | 0.0005  |
| 3 | 2 | 2 | --- | 3 | 1 | 2 | A | 8870.7447               | -0.0004 |
| 3 | 2 | 2 | --- | 3 | 1 | 2 | E | 8870.5772               | -0.0020 |
| 3 | 2 | 1 | --- | 3 | 1 | 3 | A | 13187.0176              | -0.0042 |
| 3 | 2 | 1 | --- | 3 | 1 | 3 | E | 13186.8421              | 0.0007  |
| 3 | 3 | 1 | --- | 3 | 2 | 1 | A | 17556.1826 <sup>a</sup> | 0.0020  |
| 3 | 3 | 1 | --- | 3 | 2 | 1 | E | 17554.3941 <sup>a</sup> | 0.0025  |
| 3 | 3 | 0 | --- | 3 | 2 | 2 | A | 17991.6578 <sup>a</sup> | 0.0013  |
| 3 | 3 | 0 | --- | 3 | 2 | 2 | E | 17992.8800 <sup>a</sup> | 0.0047  |
| 4 | 0 | 4 | --- | 3 | 1 | 2 | A | 12924.6228              | -0.0024 |
| 4 | 0 | 4 | --- | 3 | 1 | 2 | E | 12924.6689              | 0.0002  |
| 4 | 1 | 3 | --- | 3 | 2 | 1 | A | 11422.9873              | 0.0009  |
| 4 | 1 | 3 | --- | 3 | 2 | 1 | E | 11423.0743              | -0.0006 |
| 4 | 2 | 3 | --- | 4 | 1 | 3 | A | 7703.0374               | 0.0002  |
| 4 | 2 | 3 | --- | 4 | 1 | 3 | E | 7702.8907               | -0.0031 |
| 4 | 2 | 2 | --- | 4 | 1 | 4 | A | 15366.0127              | -0.0029 |
| 4 | 2 | 2 | --- | 4 | 1 | 4 | E | 15365.8091              | 0.0017  |
| 4 | 3 | 2 | --- | 4 | 2 | 2 | A | 16985.6941              | -0.0009 |
| 4 | 3 | 2 | --- | 4 | 2 | 2 | E | 16985.1535              | -0.0024 |
| 4 | 3 | 1 | --- | 4 | 2 | 3 | A | 18259.3373              | -0.0049 |
| 4 | 3 | 1 | --- | 4 | 2 | 3 | E | 18259.3203              | 0.0062  |
| 5 | 0 | 5 | --- | 4 | 1 | 3 | A | 15317.4798              | 0.0006  |
| 5 | 0 | 5 | --- | 4 | 1 | 3 | E | 15317.5338              | -0.0007 |
| 5 | 1 | 5 | --- | 4 | 2 | 3 | A | 8447.0366               | -0.0013 |
| 5 | 1 | 5 | --- | 4 | 2 | 3 | E | 8447.2194               | 0.0009  |
| 5 | 1 | 4 | --- | 4 | 2 | 2 | A | 16761.5416              | -0.0020 |
| 5 | 1 | 4 | --- | 4 | 2 | 2 | E | 16761.6225              | 0.0024  |
| 5 | 2 | 4 | --- | 5 | 1 | 4 | A | 6350.1737               | 0.0002  |
| 5 | 2 | 4 | --- | 5 | 1 | 4 | E | 6350.0495               | 0.0004  |
| 5 | 2 | 3 | --- | 5 | 1 | 5 | A | 18517.6890              | -0.0010 |
| 5 | 2 | 3 | --- | 5 | 1 | 5 | E | 18517.4506              | -0.0011 |
| 5 | 3 | 3 | --- | 5 | 2 | 3 | A | 16001.6783              | 0.0002  |
| 5 | 3 | 3 | --- | 5 | 2 | 3 | E | 16001.3395              | 0.0000  |

|   |   |   |     |   |   |   |   |            |         |
|---|---|---|-----|---|---|---|---|------------|---------|
| 5 | 3 | 2 | --- | 5 | 2 | 4 | A | 18835.4751 | 0.0000  |
| 5 | 3 | 2 | --- | 5 | 2 | 4 | E | 18835.2528 | 0.0007  |
| 6 | 0 | 6 | --- | 5 | 1 | 4 | A | 16950.6249 | -0.0044 |
| 6 | 0 | 6 | --- | 5 | 1 | 4 | E | 16950.7078 | 0.0033  |
| 6 | 1 | 6 | --- | 5 | 2 | 4 | A | 11076.2580 | 0.0004  |
| 6 | 1 | 6 | --- | 5 | 2 | 4 | E | 11076.4505 | 0.0008  |
| 6 | 1 | 5 | --- | 5 | 2 | 3 | A | 21493.9195 | 0.0006  |
| 6 | 1 | 5 | --- | 5 | 2 | 3 | E | 21493.9793 | -0.0003 |
| 6 | 2 | 5 | --- | 5 | 3 | 3 | A | 10411.3727 | 0.0005  |
| 6 | 2 | 5 | --- | 5 | 3 | 3 | E | 10411.6681 | 0.0008  |
| 6 | 2 | 4 | --- | 5 | 3 | 2 | A | 14935.0096 | -0.0004 |
| 6 | 2 | 4 | --- | 5 | 3 | 2 | E | 14935.1469 | 0.0003  |
| 6 | 2 | 5 | --- | 6 | 1 | 5 | A | 4919.1320  | 0.0006  |
| 6 | 2 | 5 | --- | 6 | 1 | 5 | E | 4919.0264  | -0.0008 |
| 6 | 2 | 4 | --- | 6 | 1 | 6 | A | 22694.2218 | -0.0056 |
| 6 | 2 | 4 | --- | 6 | 1 | 6 | E | 22693.9489 | -0.0001 |
| 6 | 3 | 4 | --- | 6 | 2 | 4 | A | 14597.7967 | 0.0004  |
| 6 | 3 | 4 | --- | 6 | 2 | 4 | E | 14597.5143 | 0.0006  |
| 7 | 0 | 7 | --- | 6 | 1 | 5 | A | 17986.8180 | -0.0019 |
| 7 | 0 | 7 | --- | 6 | 1 | 5 | E | 17986.9230 | 0.0012  |
| 7 | 1 | 7 | --- | 6 | 2 | 5 | A | 13325.7286 | 0.0004  |
| 7 | 1 | 7 | --- | 6 | 2 | 5 | E | 13325.9405 | 0.0004  |
| 7 | 2 | 6 | --- | 6 | 3 | 4 | A | 14353.7794 | -0.0005 |
| 7 | 2 | 6 | --- | 6 | 3 | 4 | E | 14354.0284 | 0.0001  |
| 7 | 2 | 5 | --- | 6 | 3 | 3 | A | 21261.5581 | -0.0019 |
| 7 | 2 | 5 | --- | 6 | 3 | 3 | E | 21261.7106 | 0.0005  |
| 7 | 3 | 5 | --- | 6 | 4 | 3 | A | 9766.3392  | 0.0000  |
| 7 | 3 | 5 | --- | 6 | 4 | 3 | E | 9767.6104  | 0.0007  |
| 7 | 3 | 4 | --- | 6 | 4 | 2 | A | 11117.9315 | -0.0027 |
| 7 | 3 | 5 | --- | 7 | 2 | 5 | A | 12839.9735 | 0.0004  |
| 7 | 3 | 5 | --- | 7 | 2 | 5 | E | 12839.7215 | -0.0002 |
| 7 | 3 | 4 | --- | 7 | 2 | 6 | A | 21708.0273 | 0.0012  |
| 7 | 3 | 4 | --- | 7 | 2 | 6 | E | 21707.7359 | 0.0004  |
| 7 | 4 | 4 | --- | 7 | 3 | 4 | A | 23610.8228 | 0.0002  |
| 7 | 4 | 4 | --- | 7 | 3 | 4 | E | 23610.1520 | 0.0015  |



|   |   |   |     |   |   |   |   |            |         |
|---|---|---|-----|---|---|---|---|------------|---------|
| 8 | 0 | 8 | --- | 7 | 1 | 6 | A | 18658.0840 | -0.0004 |
| 8 | 0 | 8 | --- | 7 | 1 | 6 | E | 18658.2168 | 0.0018  |
| 8 | 1 | 8 | --- | 7 | 2 | 6 | A | 15242.6446 | -0.0014 |
| 8 | 1 | 8 | --- | 7 | 2 | 6 | E | 15242.8865 | -0.0020 |
| 8 | 2 | 7 | --- | 7 | 3 | 5 | A | 17899.1760 | -0.0010 |
| 8 | 2 | 7 | --- | 7 | 3 | 5 | E | 17899.4118 | 0.0003  |
| 8 | 3 | 6 | --- | 7 | 4 | 4 | A | 14605.9065 | 0.0002  |
| 8 | 3 | 6 | --- | 7 | 4 | 4 | E | 14606.4843 | -0.0005 |
| 8 | 3 | 5 | --- | 7 | 4 | 3 | A | 17276.4221 | 0.0001  |
| 8 | 3 | 5 | --- | 7 | 4 | 3 | E | 17276.4594 | -0.0022 |
| 8 | 4 | 5 | --- | 7 | 5 | 3 | A | 7870.1303  | 0.0001  |
| 8 | 3 | 6 | --- | 8 | 2 | 6 | A | 10833.5455 | 0.0007  |
| 8 | 3 | 6 | --- | 8 | 2 | 6 | E | 10833.3202 | -0.0012 |

---

<sup>a</sup> Averaged value.

**Table S-2** All the observed lines of the *trans* form of isopropyl methyl sulfide.

| J                         | K- | K+ | --- | J | K- | K+ | Sym | obs/MHz    | diff/MHz |
|---------------------------|----|----|-----|---|----|----|-----|------------|----------|
| <i>a</i> -type transition |    |    |     |   |    |    |     |            |          |
| 1                         | 0  | 1  | --- | 0 | 0  | 0  | A   | 5352.8605  | 0.0018   |
| 1                         | 0  | 1  | --- | 0 | 0  | 0  | E   | 5352.8303  | -0.0004  |
| 2                         | 0  | 2  | --- | 1 | 0  | 1  | A   | 10693.8430 | 0.0005   |
| 2                         | 0  | 2  | --- | 1 | 0  | 1  | E   | 10693.7828 | -0.0001  |
| 2                         | 1  | 2  | --- | 1 | 1  | 1  | A   | 10509.6962 | 0.0031   |
| 2                         | 1  | 2  | --- | 1 | 1  | 1  | E   | 10509.6162 | 0.0026   |
| 2                         | 1  | 1  | --- | 1 | 1  | 0  | A   | 10901.6460 | -0.0019  |
| 2                         | 1  | 1  | --- | 1 | 1  | 0  | E   | 10901.6203 | 0.0023   |
| 3                         | 0  | 3  | --- | 2 | 0  | 2  | A   | 16011.3603 | -0.0014  |
| 3                         | 0  | 3  | --- | 2 | 0  | 2  | E   | 16011.2650 | 0.0014   |
| 3                         | 1  | 3  | --- | 2 | 1  | 2  | A   | 15757.2721 | -0.0024  |
| 3                         | 1  | 3  | --- | 2 | 1  | 2  | E   | 15757.1509 | 0.0000   |
| 3                         | 1  | 2  | --- | 2 | 1  | 1  | A   | 16344.7522 | -0.0021  |
| 3                         | 1  | 2  | --- | 2 | 1  | 1  | E   | 16344.7137 | 0.0038   |
| 3                         | 2  | 2  | --- | 2 | 2  | 1  | A   | 16058.3228 | -0.0037  |
| 3                         | 2  | 2  | --- | 2 | 2  | 1  | E   | 16058.4117 | -0.0054  |
| 3                         | 2  | 1  | --- | 2 | 2  | 0  | A   | 16105.4747 | -0.0029  |
| 3                         | 2  | 1  | --- | 2 | 2  | 0  | E   | 16105.2352 | 0.0003   |
| 4                         | 0  | 4  | --- | 3 | 0  | 3  | A   | 21295.2060 | -0.0008  |
| 4                         | 0  | 4  | --- | 3 | 0  | 3  | E   | 21295.0609 | 0.0003   |
| 4                         | 1  | 4  | --- | 3 | 1  | 3  | A   | 20996.7501 | -0.0022  |
| 4                         | 1  | 4  | --- | 3 | 1  | 3  | E   | 20996.5859 | 0.0008   |
| 4                         | 1  | 3  | --- | 3 | 1  | 2  | A   | 21777.9587 | -0.0005  |
| 4                         | 1  | 3  | --- | 3 | 1  | 2  | E   | 21777.8990 | 0.0029   |
| 4                         | 2  | 3  | --- | 3 | 2  | 2  | A   | 21401.7059 | -0.0010  |
| 4                         | 2  | 3  | --- | 3 | 2  | 2  | E   | 21401.6244 | 0.0006   |
| 4                         | 2  | 2  | --- | 3 | 2  | 1  | A   | 21517.7598 | -0.0024  |
| 4                         | 2  | 2  | --- | 3 | 2  | 1  | E   | 21517.6554 | 0.0034   |
| 4                         | 3  | 2  | --- | 3 | 3  | 1  | A   | 21433.2262 | -0.0014  |
| 4                         | 3  | 2  | --- | 3 | 3  | 1  | E   | 21434.0235 | 0.0004   |
| 4                         | 3  | 1  | --- | 3 | 3  | 0  | A   | 21435.9198 | -0.0049  |

|                           |   |   |     |   |   |   |   |            |         |
|---------------------------|---|---|-----|---|---|---|---|------------|---------|
| 4                         | 3 | 1 | --- | 3 | 3 | 0 | E | 21434.9231 | 0.0005  |
| <i>c</i> -type transition |   |   |     |   |   |   |   |            |         |
| 1                         | 1 | 0 | --- | 0 | 0 | 0 | A | 7879.8114  | -0.0002 |
| 1                         | 1 | 0 | --- | 0 | 0 | 0 | E | 7879.7974  | -0.0002 |
| 2                         | 0 | 2 | --- | 1 | 1 | 0 | A | 8166.8936  | 0.0039  |
| 2                         | 0 | 2 | --- | 1 | 1 | 0 | E | 8166.8159  | -0.0001 |
| 2                         | 1 | 1 | --- | 1 | 0 | 1 | A | 13428.6000 | -0.0008 |
| 2                         | 1 | 1 | --- | 1 | 0 | 1 | E | 13428.5837 | -0.0012 |
| 2                         | 2 | 0 | --- | 1 | 1 | 0 | A | 17906.4196 | -0.0010 |
| 2                         | 2 | 0 | --- | 1 | 1 | 0 | E | 17906.5562 | -0.0022 |
| 2                         | 2 | 1 | --- | 1 | 1 | 1 | A | 18090.5361 | -0.0032 |
| 2                         | 2 | 1 | --- | 1 | 1 | 1 | E | 18090.2740 | 0.0010  |
| 2                         | 2 | 1 | --- | 2 | 1 | 1 | A | 6992.9151  | 0.0015  |
| 2                         | 2 | 1 | --- | 2 | 1 | 1 | E | 6992.6435  | 0.0000  |
| 2                         | 2 | 0 | --- | 2 | 1 | 2 | A | 7592.6992  | -0.0060 |
| 2                         | 2 | 0 | --- | 2 | 1 | 2 | E | 7592.9573  | 0.0009  |
| 3                         | 0 | 3 | --- | 2 | 1 | 1 | A | 13276.6068 | 0.0034  |
| 3                         | 0 | 3 | --- | 2 | 1 | 1 | E | 13276.4614 | -0.0003 |
| 3                         | 1 | 2 | --- | 2 | 0 | 2 | A | 19079.5120 | -0.0006 |
| 3                         | 1 | 2 | --- | 2 | 0 | 2 | E | 19079.5120 | 0.0001  |
| 3                         | 1 | 3 | --- | 2 | 2 | 1 | A | 8176.4315  | 0.0032  |
| 3                         | 1 | 3 | --- | 2 | 2 | 1 | E | 8176.4916  | 0.0001  |
| 3                         | 1 | 2 | --- | 2 | 2 | 0 | A | 9339.9766  | -0.0051 |
| 3                         | 1 | 2 | --- | 2 | 2 | 0 | E | 9339.7716  | 0.0021  |
| 3                         | 2 | 1 | --- | 2 | 1 | 1 | A | 23110.2504 | 0.0002  |
| 3                         | 2 | 1 | --- | 2 | 1 | 1 | E | 23110.1753 | -0.0001 |
| 3                         | 2 | 2 | --- | 2 | 1 | 2 | A | 23639.1728 | 0.0002  |
| 3                         | 2 | 2 | --- | 2 | 1 | 2 | E | 23639.0769 | 0.0003  |
| 3                         | 2 | 2 | --- | 3 | 1 | 2 | A | 6706.4836  | -0.0021 |
| 3                         | 2 | 2 | --- | 3 | 1 | 2 | E | 6706.3478  | -0.0028 |
| 3                         | 2 | 1 | --- | 3 | 1 | 3 | A | 7940.9049  | -0.0033 |
| 3                         | 2 | 1 | --- | 3 | 1 | 3 | E | 7941.0421  | 0.0017  |
| 3                         | 3 | 1 | --- | 3 | 2 | 1 | A | 12093.0478 | -0.0056 |
| 3                         | 3 | 1 | --- | 3 | 2 | 1 | E | 12090.7640 | 0.0014  |
| 3                         | 3 | 0 | --- | 3 | 2 | 2 | A | 12152.5149 | 0.0008  |

|   |   |   |     |   |   |   |   |            |         |
|---|---|---|-----|---|---|---|---|------------|---------|
| 3 | 3 | 0 | --- | 3 | 2 | 2 | E | 12154.7563 | -0.0006 |
| 3 | 3 | 1 | --- | 3 | 2 | 2 | E | 12149.8819 | 0.0045  |
| 3 | 3 | 0 | --- | 3 | 2 | 1 | E | 12095.6429 | 0.0007  |
| 4 | 1 | 4 | --- | 3 | 2 | 2 | A | 13114.8573 | 0.0031  |
| 4 | 1 | 4 | --- | 3 | 2 | 2 | E | 13114.6581 | -0.0013 |
| 4 | 1 | 3 | --- | 3 | 2 | 1 | A | 15012.4633 | 0.0000  |
| 4 | 1 | 3 | --- | 3 | 2 | 1 | E | 15012.4368 | 0.0061  |
| 4 | 0 | 4 | --- | 3 | 1 | 2 | A | 18227.0585 | 0.0025  |
| 4 | 0 | 4 | --- | 3 | 1 | 2 | E | 18226.8120 | -0.0003 |
| 4 | 2 | 3 | --- | 4 | 1 | 3 | A | 6330.2298  | -0.0037 |
| 4 | 2 | 3 | --- | 4 | 1 | 3 | E | 6330.0765  | -0.0018 |
| 4 | 2 | 2 | --- | 4 | 1 | 4 | A | 8461.9129  | -0.0052 |
| 4 | 2 | 2 | --- | 4 | 1 | 4 | E | 8462.1099  | 0.0026  |
| 4 | 3 | 2 | --- | 4 | 2 | 2 | A | 12008.5226 | 0.0038  |
| 4 | 3 | 2 | --- | 4 | 2 | 2 | E | 12007.1343 | 0.0006  |
| 4 | 3 | 1 | --- | 4 | 2 | 3 | A | 12186.7359 | 0.0040  |
| 4 | 3 | 1 | --- | 4 | 2 | 3 | E | 12188.0630 | 0.0073  |
| 4 | 4 | 1 | --- | 4 | 3 | 1 | A | 16979.3372 | -0.0043 |
| 4 | 4 | 0 | --- | 4 | 3 | 2 | A | 16982.5095 | 0.0061  |
| 4 | 4 | 0 | --- | 4 | 3 | 2 | E | 16987.0190 | 0.0018  |
| 4 | 4 | 1 | --- | 4 | 3 | 2 | E | 16980.5453 | 0.0009  |
| 4 | 4 | 0 | --- | 4 | 3 | 1 | E | 16981.2392 | 0.0010  |
| 5 | 1 | 5 | --- | 4 | 2 | 3 | A | 17939.5523 | 0.0014  |
| 5 | 1 | 5 | --- | 4 | 2 | 3 | E | 17939.2261 | -0.0018 |
| 5 | 1 | 4 | --- | 4 | 2 | 2 | A | 20691.5808 | -0.0052 |
| 5 | 1 | 4 | --- | 4 | 2 | 2 | E | 20691.5808 | 0.0035  |
| 5 | 0 | 5 | --- | 4 | 1 | 3 | A | 22987.9446 | 0.0038  |
| 5 | 0 | 5 | --- | 4 | 1 | 3 | E | 22987.5538 | -0.0010 |
| 5 | 2 | 4 | --- | 5 | 1 | 4 | A | 5870.4146  | -0.0002 |
| 5 | 2 | 4 | --- | 5 | 1 | 4 | E | 5870.2068  | -0.0029 |
| 5 | 2 | 3 | --- | 5 | 1 | 5 | A | 9197.5946  | -0.0048 |
| 5 | 2 | 3 | --- | 5 | 1 | 5 | E | 9197.9101  | 0.0033  |
| 5 | 3 | 3 | --- | 5 | 2 | 3 | A | 11845.9349 | 0.0024  |
| 5 | 3 | 3 | --- | 5 | 2 | 3 | E | 11845.3783 | -0.0014 |
| 5 | 3 | 2 | --- | 5 | 2 | 4 | A | 12258.5619 | 0.0044  |

|   |   |   |     |   |   |   |   |            |         |
|---|---|---|-----|---|---|---|---|------------|---------|
| 5 | 3 | 2 | --- | 5 | 2 | 4 | E | 12259.0282 | 0.0014  |
| 5 | 4 | 2 | --- | 5 | 3 | 2 | A | 16959.7875 | 0.0029  |
| 5 | 4 | 2 | --- | 5 | 3 | 2 | E | 16956.1352 | 0.0006  |
| 5 | 4 | 1 | --- | 5 | 3 | 3 | A | 16972.4606 | 0.0072  |
| 5 | 4 | 1 | --- | 5 | 3 | 3 | E | 16976.0314 | -0.0017 |
| 5 | 4 | 2 | --- | 5 | 3 | 3 | E | 16969.5728 | -0.0043 |
| 5 | 4 | 1 | --- | 5 | 3 | 2 | E | 16962.5907 | 0.0000  |
| 5 | 5 | 1 | --- | 5 | 4 | 1 | A | 21836.4313 | -0.0082 |
| 5 | 5 | 0 | --- | 5 | 4 | 2 | A | 21836.5593 | -0.0086 |
| 5 | 5 | 1 | --- | 5 | 4 | 2 | E | 21835.6525 | 0.0008  |
| 5 | 5 | 0 | --- | 5 | 4 | 1 | E | 21837.2765 | -0.0011 |
| 6 | 2 | 4 | --- | 5 | 3 | 2 | A | 20577.9978 | -0.0026 |
| 6 | 1 | 6 | --- | 5 | 2 | 4 | A | 22647.7226 | 0.0012  |
| 6 | 1 | 6 | --- | 5 | 2 | 4 | E | 22647.2801 | 0.0002  |
| 6 | 2 | 4 | --- | 6 | 1 | 6 | A | 10188.8319 | -0.0046 |
| 6 | 2 | 4 | --- | 6 | 1 | 6 | E | 10189.3154 | 0.0047  |
| 6 | 2 | 5 | --- | 6 | 1 | 5 | A | 5336.6368  | -0.0026 |
| 6 | 2 | 5 | --- | 6 | 1 | 5 | E | 5336.3711  | -0.0031 |
| 6 | 3 | 4 | --- | 6 | 2 | 4 | A | 11578.3326 | 0.0022  |
| 6 | 3 | 4 | --- | 6 | 2 | 4 | E | 11578.0061 | -0.0028 |
| 6 | 3 | 3 | --- | 6 | 2 | 5 | A | 12389.7733 | 0.0050  |
| 6 | 3 | 3 | --- | 6 | 2 | 5 | E | 12389.9779 | -0.0001 |
| 6 | 4 | 3 | --- | 6 | 3 | 3 | A | 16921.5053 | 0.0035  |
| 6 | 4 | 3 | --- | 6 | 3 | 3 | E | 16918.3846 | -0.0016 |
| 6 | 4 | 2 | --- | 6 | 3 | 4 | A | 16959.5051 | 0.0044  |
| 6 | 4 | 2 | --- | 6 | 3 | 4 | E | 16962.5281 | -0.0039 |
| 6 | 4 | 2 | --- | 6 | 3 | 3 | E | 16924.8463 | -0.0032 |
| 6 | 5 | 2 | --- | 6 | 4 | 2 | A | 21825.0292 | 0.0045  |
| 6 | 5 | 1 | --- | 6 | 4 | 3 | A | 21825.6707 | 0.0027  |
| 6 | 5 | 2 | --- | 6 | 4 | 3 | E | 21824.5078 | 0.0001  |
| 6 | 5 | 1 | --- | 6 | 4 | 2 | E | 21826.1003 | -0.0010 |
| 7 | 2 | 6 | --- | 7 | 1 | 6 | A | 4742.9576  | -0.0009 |
| 7 | 2 | 6 | --- | 7 | 1 | 6 | E | 4742.6294  | -0.0024 |
| 7 | 2 | 5 | --- | 7 | 1 | 7 | E | 11468.0946 | -0.0017 |
| 7 | 3 | 5 | --- | 7 | 2 | 5 | A | 11186.7583 | -0.0003 |

|    |   |   |     |    |   |   |   |            |         |
|----|---|---|-----|----|---|---|---|------------|---------|
| 7  | 3 | 5 | --- | 7  | 2 | 5 | E | 11186.4384 | -0.0027 |
| 7  | 3 | 4 | --- | 7  | 2 | 6 | A | 12608.6495 | 0.0052  |
| 7  | 3 | 4 | --- | 7  | 2 | 6 | E | 12608.8249 | 0.0001  |
| 7  | 4 | 4 | --- | 7  | 3 | 4 | A | 16852.1996 | 0.0033  |
| 7  | 4 | 4 | --- | 7  | 3 | 4 | E | 16849.8211 | -0.0006 |
| 7  | 4 | 3 | --- | 7  | 3 | 5 | A | 16946.8791 | 0.0033  |
| 7  | 4 | 3 | --- | 7  | 3 | 5 | E | 16949.1519 | 0.0086  |
| 7  | 5 | 3 | --- | 7  | 4 | 3 | A | 21806.5866 | 0.0012  |
| 7  | 5 | 2 | --- | 7  | 4 | 4 | A | 21808.9538 | 0.0075  |
| 7  | 5 | 3 | --- | 7  | 4 | 4 | E | 21807.1096 | -0.0040 |
| 7  | 5 | 2 | --- | 7  | 4 | 3 | E | 21808.3171 | -0.0082 |
| 8  | 4 | 5 | --- | 8  | 3 | 5 | A | 16734.5266 | 0.0018  |
| 8  | 4 | 5 | --- | 8  | 3 | 5 | E | 16733.1491 | 0.0011  |
| 8  | 4 | 4 | --- | 8  | 3 | 6 | A | 16941.1435 | 0.0024  |
| 8  | 4 | 4 | --- | 8  | 3 | 6 | E | 16942.3829 | 0.0067  |
| 8  | 5 | 3 | --- | 8  | 4 | 5 | A | 21785.1191 | 0.0039  |
| 9  | 4 | 6 | --- | 9  | 3 | 6 | A | 16545.9584 | 0.0012  |
| 9  | 4 | 6 | --- | 9  | 3 | 6 | E | 16545.2239 | -0.0015 |
| 9  | 4 | 5 | --- | 9  | 3 | 7 | A | 16953.1520 | 0.0007  |
| 9  | 4 | 5 | --- | 9  | 3 | 7 | E | 16953.6858 | -0.0070 |
| 9  | 5 | 5 | --- | 9  | 4 | 5 | A | 21734.9931 | 0.0004  |
| 9  | 5 | 4 | --- | 9  | 4 | 6 | A | 21753.3588 | 0.0012  |
| 10 | 4 | 7 | --- | 10 | 3 | 7 | A | 16260.2334 | 0.0029  |
| 10 | 4 | 7 | --- | 10 | 3 | 7 | E | 16259.7124 | -0.0014 |
| 10 | 4 | 6 | --- | 10 | 3 | 8 | A | 16998.9664 | 0.0000  |
| 10 | 4 | 6 | --- | 10 | 3 | 8 | E | 16999.2225 | -0.0074 |
| 10 | 5 | 6 | --- | 10 | 4 | 6 | A | 21671.1428 | -0.0021 |
| 10 | 5 | 5 | --- | 10 | 4 | 7 | A | 21713.7933 | -0.0018 |

---

**Table S-3** Molecular parameters and the observed transition frequencies of the *trans* form of isopropyl methyl sulfide (IPMS) in the satellite state, which is possibly the excited isopC-S torsional state.<sup>d</sup>

|               |                 |            |                               |
|---------------|-----------------|------------|-------------------------------|
| $A$           | 5105.39031 (35) | $I_\alpha$ | 3.139995 <sup>b</sup>         |
| $B$           | 2774.42434 (28) | $\theta_a$ | 111.816 <sup>o a,b</sup>      |
| $C$           | 2578.42095 (26) | $\theta_b$ | 90.00 <sup>o a,b</sup>        |
| $\Delta_J$    | 0.0012547 (59)  | $\theta_c$ | 21.816 <sup>o a,b</sup>       |
| $\Delta_{JK}$ | 0.0041863 (40)  | $F_0$      | 160949. <sup>b</sup>          |
| $\Delta_K$    | -0.0037438 (87) | $V_3$      | 559.413 (38) cm <sup>-1</sup> |
| $\delta_J$    | -0.0000230 (18) | $s$        | 45.4685 (31)                  |
| $\delta_K$    | 0.00029933 (53) | $\sigma^c$ | 0.0076                        |

| J                         | K- | K+ | --- | J | K- | K+ | Sym | obs/MHz                 | diff/MHz |
|---------------------------|----|----|-----|---|----|----|-----|-------------------------|----------|
| <i>a</i> -type transition |    |    |     |   |    |    |     |                         |          |
| 1                         | 0  | 1  | --- | 0 | 0  | 0  | A   | 5352.8463               | -0.0123  |
| 1                         | 0  | 1  | --- | 0 | 0  | 0  | E   | 5352.8303 <sup>e</sup>  | -0.0004  |
| 2                         | 0  | 2  | --- | 1 | 0  | 1  | A   | 10693.8430 <sup>e</sup> | 0.0009   |
| 2                         | 0  | 2  | --- | 1 | 0  | 1  | E   | 10693.7828 <sup>e</sup> | 0.0000   |
| 2                         | 1  | 2  | --- | 1 | 1  | 1  | A   | 10509.6962 <sup>e</sup> | 0.0052   |
| 2                         | 1  | 2  | --- | 1 | 1  | 1  | E   | 10509.6162 <sup>e</sup> | 0.0044   |
| 2                         | 1  | 1  | --- | 1 | 1  | 0  | A   | 10901.6343              | -0.0153  |
| 2                         | 1  | 1  | --- | 1 | 1  | 0  | E   | 10901.6203 <sup>e</sup> | 0.0006   |
| 3                         | 0  | 3  | --- | 2 | 0  | 2  | A   | 16011.3603 <sup>e</sup> | -0.0005  |
| 3                         | 0  | 3  | --- | 2 | 0  | 2  | E   | 16011.2650 <sup>e</sup> | 0.0019   |
| 3                         | 1  | 3  | --- | 2 | 1  | 2  | A   | 15757.2721 <sup>e</sup> | 0.0003   |
| 3                         | 1  | 3  | --- | 2 | 1  | 2  | E   | 15757.1509 <sup>e</sup> | 0.0021   |
| 3                         | 1  | 2  | --- | 2 | 1  | 1  | A   | 16344.7522 <sup>e</sup> | -0.0041  |
| 3                         | 1  | 2  | --- | 2 | 1  | 1  | E   | 16344.7137 <sup>e</sup> | 0.0015   |
| 3                         | 2  | 2  | --- | 2 | 2  | 1  | A   | 16058.3228 <sup>e</sup> | -0.0032  |
| 3                         | 2  | 2  | --- | 2 | 2  | 1  | E   | 16058.4117 <sup>e</sup> | -0.0039  |
| 3                         | 2  | 1  | --- | 2 | 2  | 0  | A   | 16105.4747 <sup>e</sup> | -0.0033  |
| 3                         | 2  | 1  | --- | 2 | 2  | 0  | E   | 16105.2352 <sup>e</sup> | -0.0019  |

|   |   |   |     |   |   |   |   |                         |         |
|---|---|---|-----|---|---|---|---|-------------------------|---------|
| 4 | 0 | 4 | --- | 3 | 0 | 3 | A | 21295.2060 <sup>c</sup> | 0.0005  |
| 4 | 0 | 4 | --- | 3 | 0 | 3 | E | 21295.0609 <sup>c</sup> | 0.0011  |
| 4 | 1 | 4 | --- | 3 | 1 | 3 | A | 20996.7501 <sup>c</sup> | 0.0003  |
| 4 | 1 | 4 | --- | 3 | 1 | 3 | E | 20996.5859 <sup>c</sup> | 0.0026  |
| 4 | 1 | 3 | --- | 3 | 1 | 2 | A | 21777.9587 <sup>c</sup> | -0.0024 |
| 4 | 1 | 3 | --- | 3 | 1 | 2 | E | 21777.8990 <sup>c</sup> | 0.0007  |
| 4 | 2 | 3 | --- | 3 | 2 | 2 | A | 21401.7059 <sup>c</sup> | -0.0005 |
| 4 | 2 | 3 | --- | 3 | 2 | 2 | E | 21401.6244 <sup>c</sup> | 0.0009  |
| 4 | 2 | 2 | --- | 3 | 2 | 1 | A | 21517.7598 <sup>c</sup> | -0.0036 |
| 4 | 2 | 2 | --- | 3 | 2 | 1 | E | 21517.6554 <sup>c</sup> | 0.0016  |
| 4 | 3 | 2 | --- | 3 | 3 | 1 | A | 21433.2262 <sup>c</sup> | -0.0009 |
| 4 | 3 | 2 | --- | 3 | 3 | 1 | E | 21434.0235 <sup>c</sup> | 0.0021  |
| 4 | 3 | 1 | --- | 3 | 3 | 0 | A | 21435.9198 <sup>c</sup> | -0.0045 |
| 4 | 3 | 1 | --- | 3 | 3 | 0 | E | 21434.9231 <sup>c</sup> | -0.0012 |

*c*-type transition

|   |   |   |     |   |   |   |   |                         |         |
|---|---|---|-----|---|---|---|---|-------------------------|---------|
| 1 | 1 | 0 | --- | 0 | 0 | 0 | A | 7879.8114 <sup>c</sup>  | -0.0025 |
| 1 | 1 | 0 | --- | 0 | 0 | 0 | E | 7879.7974 <sup>c</sup>  | -0.0026 |
| 2 | 0 | 2 | --- | 1 | 1 | 0 | A | 8166.8936 <sup>c</sup>  | 0.0068  |
| 2 | 0 | 2 | --- | 1 | 1 | 0 | E | 8166.8159 <sup>c</sup>  | 0.0024  |
| 2 | 1 | 1 | --- | 1 | 0 | 1 | A | 13428.6000 <sup>c</sup> | -0.0049 |
| 2 | 1 | 1 | --- | 1 | 0 | 1 | E | 13428.5837 <sup>c</sup> | -0.0053 |
| 2 | 2 | 0 | --- | 1 | 1 | 0 | A | 17906.4360              | 0.0126  |
| 2 | 2 | 0 | --- | 1 | 1 | 0 | E | 17906.5562 <sup>c</sup> | -0.0035 |
| 2 | 2 | 1 | --- | 1 | 1 | 1 | A | 18090.5550              | 0.0111  |
| 2 | 2 | 1 | --- | 1 | 1 | 1 | E | 18090.2740 <sup>c</sup> | -0.0057 |
| 2 | 2 | 1 | --- | 2 | 1 | 1 | A | 6992.9015               | -0.0130 |
| 2 | 2 | 1 | --- | 2 | 1 | 1 | E | 6992.6435 <sup>c</sup>  | -0.0030 |
| 2 | 2 | 0 | --- | 2 | 1 | 2 | A | 7592.7189               | 0.0067  |
| 2 | 2 | 0 | --- | 2 | 1 | 2 | E | 7592.9573 <sup>c</sup>  | -0.0041 |
| 3 | 0 | 3 | --- | 2 | 1 | 1 | A | 13276.5859              | -0.0121 |
| 3 | 0 | 3 | --- | 2 | 1 | 1 | E | 13276.4614 <sup>c</sup> | 0.0045  |
| 3 | 1 | 2 | --- | 2 | 0 | 2 | A | 19079.5120 <sup>e</sup> | -0.0071 |
| 3 | 1 | 2 | --- | 2 | 0 | 2 | E | 19079.5120 <sup>c</sup> | -0.0064 |
| 3 | 1 | 3 | --- | 2 | 2 | 1 | A | 8176.4315 <sup>c</sup>  | 0.0126  |



|   |   |   |     |   |   |   |   |                         |         |
|---|---|---|-----|---|---|---|---|-------------------------|---------|
| 3 | 1 | 3 | --- | 2 | 2 | 1 | E | 8176.4789               | -0.0020 |
| 3 | 1 | 2 | --- | 2 | 2 | 0 | A | 9339.9766 <sup>c</sup>  | -0.0060 |
| 3 | 1 | 2 | --- | 2 | 2 | 0 | E | 9339.7839               | 0.0117  |
| 3 | 2 | 1 | --- | 2 | 1 | 1 | A | 23110.2634              | 0.0116  |
| 3 | 2 | 1 | --- | 2 | 1 | 1 | E | 23110.1753 <sup>c</sup> | -0.0018 |
| 3 | 2 | 2 | --- | 2 | 1 | 2 | A | 23639.1905              | 0.0116  |
| 3 | 2 | 2 | --- | 2 | 1 | 2 | E | 23639.0769 <sup>c</sup> | -0.0066 |
| 3 | 2 | 2 | --- | 3 | 1 | 2 | A | 6706.4836 <sup>c</sup>  | -0.0006 |
| 3 | 2 | 2 | --- | 3 | 1 | 2 | E | 6706.3478 <sup>c</sup>  | -0.0021 |
| 3 | 2 | 1 | --- | 3 | 1 | 3 | A | 7940.9304               | 0.0121  |
| 3 | 2 | 1 | --- | 3 | 1 | 3 | E | 7941.0421 <sup>c</sup>  | -0.0077 |
| 3 | 3 | 1 | --- | 3 | 2 | 1 | A | 12093.0629              | 0.0052  |
| 3 | 3 | 1 | --- | 3 | 2 | 1 | E | 12090.7846              | 0.0066  |
| 3 | 3 | 0 | --- | 3 | 2 | 2 | A | 12152.5286              | 0.0090  |
| 3 | 3 | 0 | --- | 3 | 2 | 2 | E | 12154.7384              | -0.0131 |
| 3 | 3 | 1 | --- | 3 | 2 | 2 | E | 12149.8991              | 0.0061  |
| 3 | 3 | 0 | --- | 3 | 2 | 1 | E | 12095.6236              | -0.0129 |
| 4 | 1 | 4 | --- | 3 | 2 | 2 | A | 13114.8354              | -0.0073 |
| 4 | 1 | 4 | --- | 3 | 2 | 2 | E | 13114.6581 <sup>c</sup> | 0.0095  |
| 4 | 1 | 3 | --- | 3 | 2 | 1 | A | 15012.4633 <sup>c</sup> | -0.0023 |
| 4 | 1 | 3 | --- | 3 | 2 | 1 | E | 15012.4368 <sup>c</sup> | 0.0034  |
| 4 | 0 | 4 | --- | 3 | 1 | 2 | A | 18227.0405              | -0.0066 |
| 4 | 0 | 4 | --- | 3 | 1 | 2 | E | 18226.8120 <sup>c</sup> | 0.0074  |
| 4 | 2 | 3 | --- | 4 | 1 | 3 | A | 6330.2298 <sup>c</sup>  | 0.0003  |
| 4 | 2 | 3 | --- | 4 | 1 | 3 | E | 6330.0765 <sup>c</sup>  | 0.0014  |
| 4 | 2 | 2 | --- | 4 | 1 | 4 | A | 8461.9388               | 0.0069  |
| 4 | 2 | 2 | --- | 4 | 1 | 4 | E | 8462.1099 <sup>c</sup>  | -0.0104 |
| 4 | 3 | 2 | --- | 4 | 2 | 2 | A | 12008.5226 <sup>c</sup> | 0.0012  |
| 4 | 3 | 2 | --- | 4 | 2 | 2 | E | 12007.1490              | 0.0034  |
| 4 | 3 | 1 | --- | 4 | 2 | 3 | A | 12186.7359 <sup>c</sup> | -0.0016 |
| 4 | 3 | 1 | --- | 4 | 2 | 3 | E | 12188.0504              | 0.0019  |
| 4 | 3 | 2 | --- | 4 | 2 | 3 | E | 12182.2934              | 0.0025  |
| 4 | 3 | 1 | --- | 4 | 2 | 2 | E | 12012.8979              | -0.0091 |
| 4 | 4 | 1 | --- | 4 | 3 | 1 | A | 16979.3372 <sup>c</sup> | -0.0089 |
| 4 | 4 | 0 | --- | 4 | 3 | 2 | A | 16982.5210              | 0.0129  |

|   |   |   |     |   |   |   |   |                         |         |
|---|---|---|-----|---|---|---|---|-------------------------|---------|
| 4 | 4 | 0 | --- | 4 | 3 | 2 | E | 16986.9970              | -0.0021 |
| 4 | 4 | 1 | --- | 4 | 3 | 2 | E | 16980.5560 <sup>c</sup> | 0.0015  |
| 5 | 1 | 5 | --- | 4 | 2 | 3 | A | 17939.5348              | -0.0040 |
| 5 | 1 | 5 | --- | 4 | 2 | 3 | E | 17939.2261 <sup>c</sup> | 0.0091  |
| 5 | 1 | 4 | --- | 4 | 2 | 2 | A | 20691.5808 <sup>c</sup> | -0.0075 |
| 5 | 1 | 4 | --- | 4 | 2 | 2 | E | 20691.5808 <sup>c</sup> | 0.0010  |
| 5 | 0 | 5 | --- | 4 | 1 | 3 | A | 22987.9221              | -0.0067 |
| 5 | 0 | 5 | --- | 4 | 1 | 3 | E | 22987.5538 <sup>c</sup> | 0.0093  |
| 5 | 2 | 4 | --- | 5 | 1 | 4 | A | 5870.4146 <sup>c</sup>  | 0.0054  |
| 5 | 2 | 4 | --- | 5 | 1 | 4 | E | 5870.2068 <sup>c</sup>  | 0.0017  |
| 5 | 2 | 3 | --- | 5 | 1 | 5 | A | 9197.6476               | 0.0312  |
| 5 | 2 | 3 | --- | 5 | 1 | 5 | E | 9197.9101 <sup>c</sup>  | -0.0125 |
| 5 | 3 | 3 | --- | 5 | 2 | 3 | A | 11845.9551              | 0.0222  |
| 5 | 3 | 3 | --- | 5 | 2 | 3 | E | 11845.3783 <sup>c</sup> | -0.0061 |
| 5 | 3 | 2 | --- | 5 | 2 | 4 | A | 12258.5619 <sup>c</sup> | -0.0015 |
| 5 | 3 | 2 | --- | 5 | 2 | 4 | E | 12259.0282 <sup>c</sup> | -0.0007 |
| 5 | 4 | 2 | --- | 5 | 3 | 2 | A | 16959.7875 <sup>c</sup> | -0.0006 |
| 5 | 4 | 2 | --- | 5 | 3 | 2 | E | 16956.1352 <sup>c</sup> | -0.0210 |
| 5 | 4 | 1 | --- | 5 | 3 | 3 | A | 16972.4606 <sup>c</sup> | 0.0033  |
| 5 | 4 | 1 | --- | 5 | 3 | 3 | E | 16976.0134              | -0.0059 |
| 5 | 4 | 2 | --- | 5 | 3 | 3 | E | 16969.5990              | 0.0076  |
| 5 | 4 | 1 | --- | 5 | 3 | 2 | E | 16962.5784              | -0.0057 |
| 5 | 5 | 1 | --- | 5 | 4 | 1 | A | 21836.4460              | 0.0044  |
| 5 | 5 | 0 | --- | 5 | 4 | 2 | A | 21836.5776              | 0.0075  |
| 5 | 5 | 1 | --- | 5 | 4 | 2 | E | 21835.6525 <sup>c</sup> | -0.0050 |
| 5 | 5 | 0 | --- | 5 | 4 | 1 | E | 21837.2765 <sup>c</sup> | 0.0001  |
| 6 | 2 | 4 | --- | 5 | 3 | 2 | A | 20577.9978 <sup>c</sup> | -0.0038 |
| 6 | 1 | 6 | --- | 5 | 2 | 4 | A | 22647.7053              | -0.0059 |
| 6 | 1 | 6 | --- | 5 | 2 | 4 | E | 22647.2801 <sup>c</sup> | 0.0087  |
| 6 | 2 | 4 | --- | 6 | 1 | 6 | A | 10188.8883              | 0.0344  |
| 6 | 2 | 4 | --- | 6 | 1 | 6 | E | 10189.3154 <sup>c</sup> | -0.0108 |
| 6 | 2 | 5 | --- | 6 | 1 | 5 | A | 5336.6368 <sup>c</sup>  | 0.0028  |
| 6 | 2 | 5 | --- | 6 | 1 | 5 | E | 5336.3711 <sup>c</sup>  | 0.0012  |
| 6 | 3 | 4 | --- | 6 | 2 | 4 | A | 11578.3326 <sup>c</sup> | 0.0036  |
| 6 | 3 | 4 | --- | 6 | 2 | 4 | E | 11578.0061 <sup>c</sup> | -0.0035 |

|   |   |   |     |   |   |   |   |                         |         |
|---|---|---|-----|---|---|---|---|-------------------------|---------|
| 6 | 3 | 3 | --- | 6 | 2 | 5 | A | 12389.7733 <sup>c</sup> | -0.0013 |
| 6 | 3 | 3 | --- | 6 | 2 | 5 | E | 12389.9779 <sup>c</sup> | -0.0048 |
| 6 | 4 | 3 | --- | 6 | 3 | 3 | A | 16921.5053 <sup>c</sup> | 0.0012  |
| 6 | 4 | 3 | --- | 6 | 3 | 3 | E | 16918.4008              | -0.0031 |
| 6 | 4 | 2 | --- | 6 | 3 | 4 | A | 16959.5051 <sup>c</sup> | 0.0014  |
| 6 | 4 | 2 | --- | 6 | 3 | 4 | E | 16962.5153              | -0.0046 |
| 6 | 4 | 3 | --- | 6 | 3 | 4 | E | 16956.0682              | -0.0162 |
| 6 | 4 | 2 | --- | 6 | 3 | 3 | E | 16924.8588              | 0.0194  |
| 6 | 5 | 2 | --- | 6 | 4 | 2 | A | 21825.0150              | -0.0105 |
| 6 | 5 | 1 | --- | 6 | 4 | 3 | A | 21825.6707 <sup>c</sup> | 0.0018  |
| 6 | 5 | 2 | --- | 6 | 4 | 3 | E | 21824.5078 <sup>c</sup> | -0.0045 |
| 6 | 5 | 1 | --- | 6 | 4 | 2 | E | 21826.1003 <sup>c</sup> | 0.0016  |
| 7 | 2 | 6 | --- | 7 | 1 | 6 | A | 4742.9576 <sup>c</sup>  | 0.0020  |
| 7 | 2 | 6 | --- | 7 | 1 | 6 | E | 4742.6294 <sup>c</sup>  | -0.0009 |
| 7 | 2 | 5 | --- | 7 | 1 | 7 | E | 11468.0946 <sup>c</sup> | -0.0106 |
| 7 | 3 | 5 | --- | 7 | 2 | 5 | A | 11186.7583 <sup>c</sup> | 0.0012  |
| 7 | 3 | 5 | --- | 7 | 2 | 5 | E | 11186.4384 <sup>c</sup> | -0.0029 |
| 7 | 3 | 4 | --- | 7 | 2 | 6 | A | 12608.6495 <sup>c</sup> | -0.0006 |
| 7 | 3 | 4 | --- | 7 | 2 | 6 | E | 12608.8249 <sup>c</sup> | -0.0047 |
| 7 | 4 | 4 | --- | 7 | 3 | 4 | A | 16852.1996 <sup>c</sup> | 0.0022  |
| 7 | 4 | 4 | --- | 7 | 3 | 4 | E | 16849.8342              | -0.0025 |
| 7 | 4 | 3 | --- | 7 | 3 | 5 | A | 16946.8791 <sup>c</sup> | 0.0011  |
| 7 | 4 | 3 | --- | 7 | 3 | 5 | E | 16949.1388              | 0.0068  |
| 7 | 4 | 4 | --- | 7 | 3 | 5 | E | 16942.3399              | -0.0031 |
| 7 | 4 | 3 | --- | 7 | 3 | 4 | E | 16856.6204              | -0.0053 |
| 7 | 5 | 3 | --- | 7 | 4 | 3 | A | 21806.5866 <sup>c</sup> | 0.0018  |
| 7 | 5 | 2 | --- | 7 | 4 | 4 | A | 21808.9538 <sup>c</sup> | 0.0081  |
| 7 | 5 | 3 | --- | 7 | 4 | 4 | E | 21807.1096 <sup>c</sup> | -0.0081 |
| 7 | 5 | 2 | --- | 7 | 4 | 3 | E | 21808.3171 <sup>c</sup> | -0.0035 |
| 8 | 4 | 5 | --- | 8 | 3 | 5 | A | 16734.5266 <sup>c</sup> | 0.0014  |
| 8 | 4 | 4 | --- | 8 | 3 | 6 | A | 16941.1435 <sup>c</sup> | 0.0010  |
| 8 | 4 | 4 | --- | 8 | 3 | 6 | E | 16942.3613              | -0.0068 |
| 8 | 5 | 3 | --- | 8 | 4 | 5 | A | 21785.1191 <sup>c</sup> | 0.0059  |
| 8 | 5 | 4 | --- | 8 | 4 | 5 | E | 21782.2564              | 0.0049  |
| 8 | 5 | 3 | --- | 8 | 4 | 4 | E | 21780.7883              | -0.0012 |

|    |   |   |     |    |   |   |   |                         |         |
|----|---|---|-----|----|---|---|---|-------------------------|---------|
| 9  | 4 | 6 | --- | 9  | 3 | 6 | A | 16545.9584 <sup>e</sup> | -0.0006 |
| 9  | 4 | 6 | --- | 9  | 3 | 6 | E | 16545.2239 <sup>e</sup> | -0.0087 |
| 9  | 4 | 5 | --- | 9  | 3 | 7 | A | 16953.1520 <sup>e</sup> | 0.0005  |
| 9  | 4 | 5 | --- | 9  | 3 | 7 | E | 16953.6858 <sup>e</sup> | -0.0026 |
| 9  | 5 | 5 | --- | 9  | 4 | 5 | A | 21734.9931 <sup>e</sup> | 0.0037  |
| 9  | 5 | 4 | --- | 9  | 4 | 6 | A | 21753.3588 <sup>e</sup> | 0.0044  |
| 10 | 4 | 7 | --- | 10 | 3 | 7 | A | 16260.2334 <sup>e</sup> | -0.0042 |
| 10 | 4 | 7 | --- | 10 | 3 | 7 | E | 16259.7267              | 0.0025  |
| 10 | 4 | 6 | --- | 10 | 3 | 8 | A | 16998.9664 <sup>e</sup> | 0.0021  |
| 10 | 4 | 6 | --- | 10 | 3 | 8 | E | 16999.2225 <sup>e</sup> | -0.0031 |
| 10 | 5 | 6 | --- | 10 | 4 | 6 | A | 21671.1428 <sup>e</sup> | 0.0015  |
| 10 | 5 | 5 | --- | 10 | 4 | 7 | A | 21713.7933 <sup>e</sup> | 0.0023  |

---

<sup>a</sup> Angle between the internal-rotation axis and the *a*, *b*, *c*-inertial axes.

<sup>b</sup> Fixed.

<sup>c</sup> Standard deviation of the fit.

<sup>d</sup> Values in parentheses denote one standard deviation.

<sup>e</sup> Overlapped with the ground-state transition.
